# Supplementary material for: Boosting photocatalytic hydrogen evolution of covalent organic frameworks by introducing 2D conductive metal–organic frameworks as noble metal-free co-catalysts
Source: Royal Society of Chemistry journal article supplement (doi:10.1039/d2cy00192f), 2022-01-01
Supplement: d2cy00192f1.pdf [file d2cy00192f1.pdf]

## Supporting Information

### Boosting Photocatalytic Hydrogen Evolution of Covalent Organic Frameworks by Introducing 2D Conductive Metal-organic Frameworks as Noble Metal-free Co-catalysts

Ping Xue<sup>a, b</sup>, Xin Pan<sup>b</sup>, Tian Tian<sup>a,c\*</sup>, Mi Tang<sup>b</sup>, Wei Guo<sup>a</sup>, Junsheng Li<sup>a</sup>, Zhengbang Wang<sup>b\*</sup>, Haolin Tang<sup>a,c\*</sup>

- Foshan Xianhu Laboratory of the Advanced Energy Science and Technology Guangdong Laboratory, Xianhu Hydrogen Valley, Foshan 528200, China
- Ministry of Education Key Laboratory for the Green Preparation and Application of Functional Materials, Hubei Key Laboratory of Polymer Materials, Collaborative Innovation Center for Advanced Organic Chemical Materials Co-constructed by the Province and Ministry, School of Materials Science and Engineering, Hubei University, Wuhan, 430062, China
- State Key Laboratory of Advanced Technology for Materials Synthesis and Processing, Wuhan University of Technology, Wuhan 430070, China

\*Corresponding email: [ttcx@whut.edu.cn](mailto:ttcx@whut.edu.cn); [zhengbang.wang@hubu.edu.cn](mailto:zhengbang.wang@hubu.edu.cn); [thln@whut.edu.cn](mailto:thln@whut.edu.cn)

#### Characterization instrument

X-ray diffraction (XRD, Bruker D8 with a Cu K $\alpha$  radiation, 40 KV, 40 mA,  $\lambda = 1.5418 \text{ \AA}$ ), field emission scanning electron microscope (FESEM, Sigma 500, Germany), Fourier transform infrared spectrometer (FT-IR, Nicolet iS50, America), X-ray photoelectron spectroscopy (XPS, Escalab 250Xi, America), automatic Micromeritics apparatus (ASAP2460-Vapor, Micromeritics Instrument Corporation, America), ultraviolet-visible (UV-vis, UV3600, SHIMADZU, Japan), SourceMeter (2634B, KEITHLEY, America), electrochemical workstation (Autolab PGSTAT302N, Metrohm, Switzerland), gas chromatography (GC, GC-2014C, SHIMADZU, Japan, TCD detector).

#### The calculation of AQE (apparent quantum efficiency)

$$\text{AQE} = \frac{2 \times \text{numbers of evolved hydrogen molecules}}{\text{number of incident photons}} \times 100\%$$

#### The calculation of VASP<sup>1-5</sup>

The electronic structures were calculated by the density functional theory (DFT) by using Vienna Ab-initio Simulation Package (VASP). The projector augmented wave (PAW) model with Perdew–Burke–Ernzerhof (PBE) function was employed to describe the interactions between core and electrons, an energy cutoff of 450 eV was used for the planewave expansion of the electronic

wave function. The Brillouin zones of all systems were sampled with gamma-point centered Monkhorst-Pack grids. A  $2 \times 2 \times 1$  Monkhorst Pack  $k$ -point setup were used for slab geometry optimization. The force and energy convergence criterion were set to  $0.02 \text{ eV } \text{\AA}^{-1}$  and  $10^{-5} \text{ eV}$ , respectively.

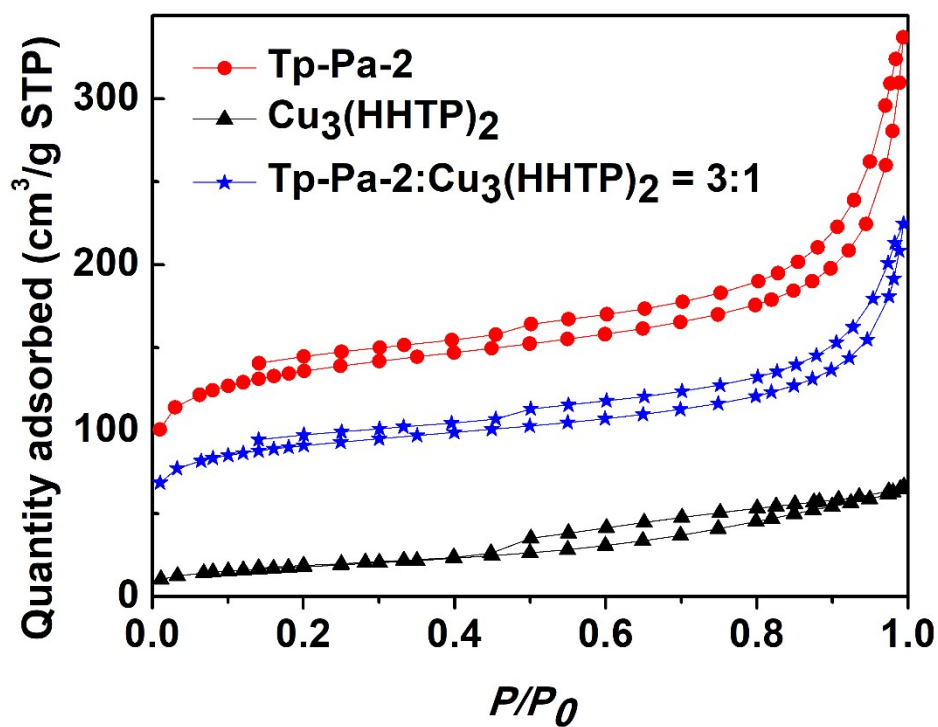

Figure S1. N<sub>2</sub> adsorption-desorption isotherm of Tp-Pa-2, Cu<sub>3</sub>(HHTP)<sub>2</sub> and Tp-Pa-2/Cu<sub>3</sub>(HHTP)<sub>2</sub> (3:1) composite.

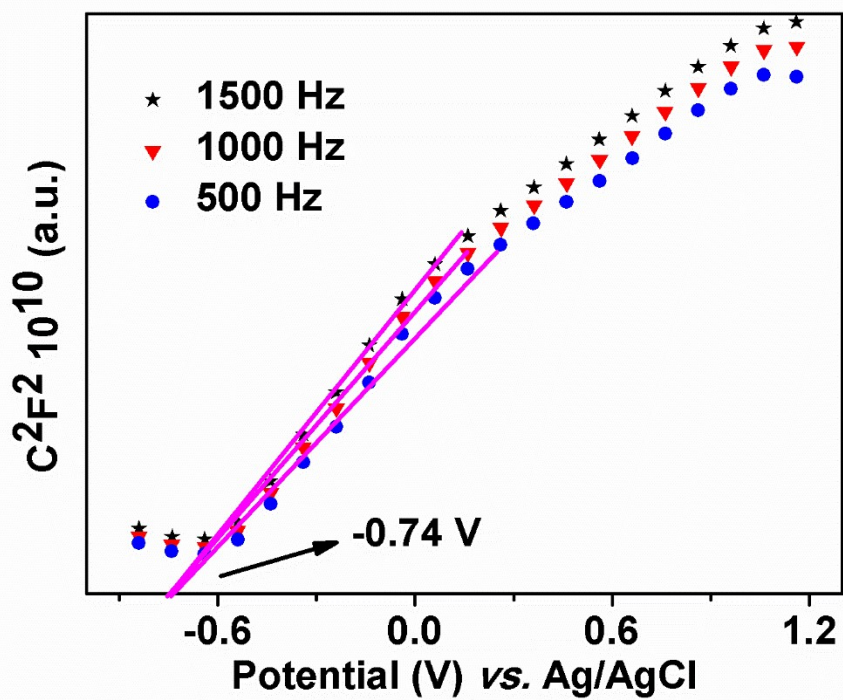

Figure S2. Mott-Schottky plot of Tp-Pa-2/Cu<sub>3</sub>(HHTP)<sub>2</sub> (3:1) composite.

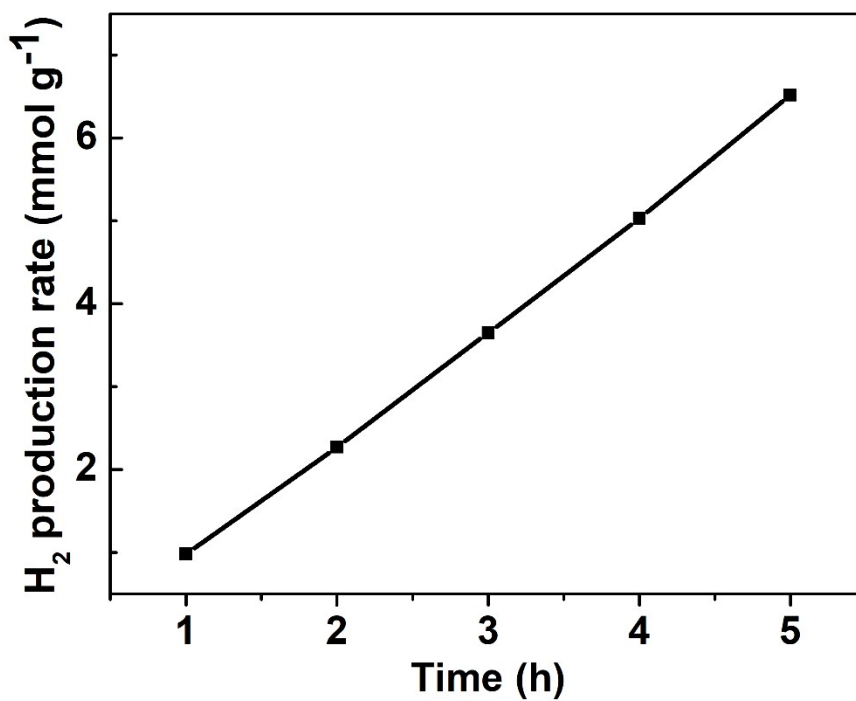

Figure S3. Photocatalytic H<sub>2</sub> production rate of Tp-Pa-2/Cu<sub>3</sub>(HHTP)<sub>2</sub> (3:1) (without full griding).

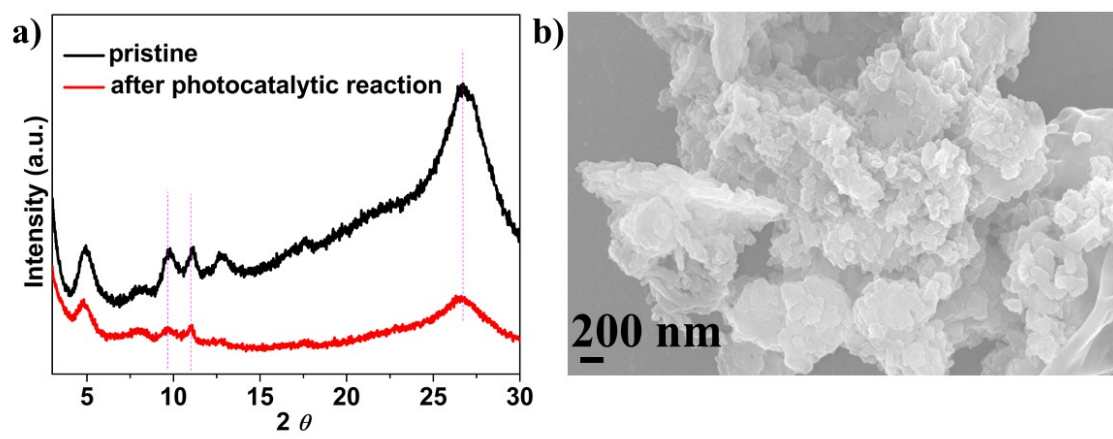

Figure S4. a) The XRD of Tp-Pa-2/Cu<sub>3</sub>(HHTP)<sub>2</sub> (3:1) composite after photocatalytic reaction; b) SEM image of Tp-Pa-2/Cu<sub>3</sub>(HHTP)<sub>2</sub> (3:1) composite after photocatalytic reaction.

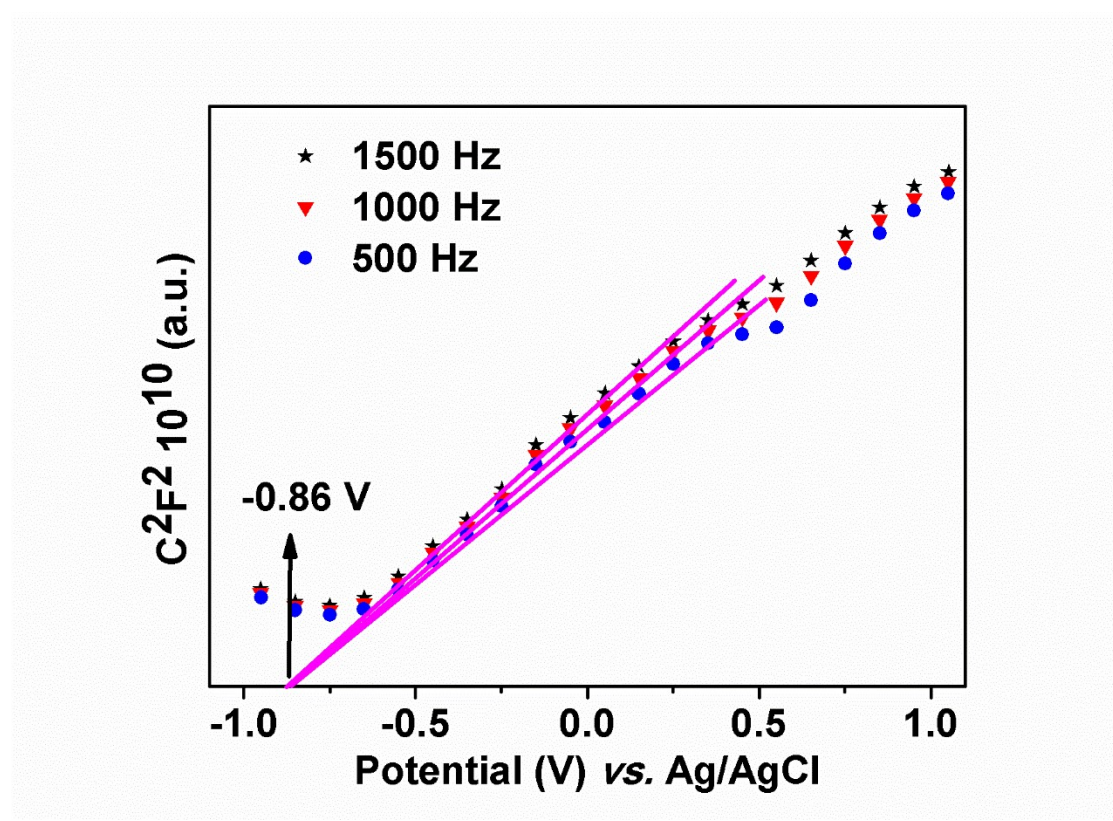

Figure S5. Mott-Schottky plot of Tp-Pa-2.

**References**

1. G. Kresse and J. Furthmüller, *Phys Rev B Condens Matter*, 1996, 54, 11169-11186.
2. G. Kresse and J. Hafner, *Phys Rev B Condens Matter*, 1994, 49, 14251-14269.
3. P. Blochl, E. Blöchl and P. Blöchl, *Phys. Rev. B*, 1994, 50, 17953.
4. J. P. Perdew, K. Burke and M. Ernzerhof, *Phys. Rev. Lett.*, 1996, 77, 3865.
5. Y. Zhang and W. Yang, *Phys. Rev. Lett.*, 1998, 80, 890.
